# Correct deconfounding enables causal machine learning for precision medicine and beyond

Vera Komeyer<sup>1,2,3\*</sup>, Prof. Dr. Simon B. Eickhoff<sup>1,2</sup>, Dr. Charles Rathkopf<sup>1</sup>, Prof. Dr. Christian Grefkes<sup>4,5,6</sup>,  
Dr. Kaustubh R. Patil<sup>1,2</sup>, Dr. Federico Raimondo<sup>1,2\*</sup>

<sup>1</sup>Institute of Neuroscience and Medicine, Brain and Behaviour (INM-7), Research Centre Juelich, Juelich, Germany

<sup>2</sup>Institute of Systems Neuroscience, Medical Faculty, Heinrich Heine University Duesseldorf, Duesseldorf, Germany

<sup>3</sup>Department of Biology, Faculty of Mathematics and Natural Sciences, Heinrich Heine University Duesseldorf, Duesseldorf, Germany

<sup>4</sup>Goethe University Frankfurt and University Hospital Frankfurt, Department of Neurology, Frankfurt (Main), Germany

<sup>5</sup>Department of Neurology, University Hospital Cologne and Medical Faculty, University of Cologne, Cologne, Germany

<sup>6</sup>Institute of Neuroscience and Medicine, Cognitive Neuroscience (INM-3), Research Centre Juelich, Juelich, Germany

\* Correspondence to Vera Komeyer ([v.komeyer@fz-juelich.de](mailto:v.komeyer@fz-juelich.de)) and Federico Raimondo ([f.raimondo@fz-juelich.de](mailto:f.raimondo@fz-juelich.de))

## Abstract

Artificial intelligence holds promise for individualized medicine. Yet, predictive models in the neurobiomedical domain suffer from a lack of generalizability and replicability so that transitioning models from prototyping to clinical applications still poses challenges. Key contributors to these challenges are confounding effects; in particular the oftentimes purely statistical perspective on confounding. However, complementing these statistical considerations with causal reasoning from domain knowledge can make predictive models a tool for causal biomedical inference beyond associative insights. Such causal insights give answers to biomedical questions of *how* and *why*, arguably what most biomedical investigations ultimately seek for. Here, we suggest a 5-step approach for targeted, context-informed deconfounding. We exemplify the 5-step approach with a real-world neurobiomedical predictive task using data from the UK Biobank. The core of this approach constitutes a bottom-up causal analysis to identify a correct set of deconfounders and the appropriate deconfounding method for a given causal predictive endeavour. Using the 5-step approach to combine causal with statistical confounder considerations can make predictive models based on observational (big) data a technique comparable to Randomized Control Trials (RCTs). Through causally motivated deconfounding we aim at facilitating the development of reliable and trustworthy AI as a medical tool. In addition, we aim to foster the relevance of low performing or even null result models if they originate from a “skilful interrogation of nature”, i.e. a deconfounding strategy derived from an adequate causal and statistical analysis. Ultimately, causal predictive modelling through appropriate deconfounding can contribute to mutual recursive feedback loops of causal insights across disciplines, scales and species that enable the field to disentangle the cause-effect structure of neurobiomedical mechanisms.

## 41 1. Main

42 Machine Learning (ML) holds promise for personalized medicine and is increasingly employed in biomedical  
43 research and applications. ML workflows use large, high-dimensional and oftentimes observational data to  
44 arrive at predictive models to identify biomarkers of health and disease or to aid in diagnosis, prognosis and  
45 treatment choice, targeted to individuals<sup>1-3</sup>. Predictive modelling is thereby a prominent strategy to derive both,  
46 scientific insights regarding biomedical mechanisms as well as a clinical tool for precision-medicine.

47 Although promising, biomedical AI suffers from unreliable predictions<sup>4-7</sup>, a lack of reproducibility and  
48 replicability, non-interpretability<sup>8</sup>, and limited generalizability<sup>9</sup> of models. A key contributor to these  
49 challenges are confounding effects<sup>10-12</sup>. Classical examples of confounders include measurement artifacts<sup>13-16</sup>,  
50 site effects<sup>17</sup>, demographics<sup>18-20</sup>, or lifestyle factors<sup>21</sup>. Large data, as required for AI applications, tend to be  
51 observational in nature. However, in observational data confounders must be accounted for by post-hoc  
52 statistical approaches, such as (linear) confounder regression<sup>10,11,13,22-26</sup>. In many biomedical disciplines it is  
53 common to correct for a conventionally established set of confounders, such as *sex* and *age*<sup>5,10,27,28</sup>, without  
54 any justification<sup>29-31</sup>. If a justification is given, this is often in the form of a statistical association between the  
55 predictors and the confounder<sup>29,32,33</sup>. Reporting statistical associations appears appropriate when following the  
56 ubiquitous (but faulty – see **Box 3**) definition of confounders as any variable that correlates with the feature  
57 (predictor) and the target (outcome), but which's variance is of no interest<sup>34,35</sup>. Despite a variety of statistical  
58 methods for post-hoc confounder treatment, confounding still leads to - or is at least part of - the AI-challenges  
59 mentioned above. The reason being, treating confounding based on the above definition as a purely statistical  
60 notion, leads to confounding being dealt with purely by statistical means. However, confounding is not only a  
61 statistical notion, but also necessitates causal reasoning<sup>36</sup>, on which we will elaborate within this paper.

62 Complementing statistical confounder considerations with causal reasoning from domain knowledge can make  
63 predictive models a tool for causal biomedical inference, going beyond associative insights. Here, we explain  
64 and exemplify how targeted, context-informed deconfounding in observational (big) data can make predictive  
65 models a technique comparable to Randomized Control Trials (RCTs). First, we distinguish between *high*  
66 *performance* and *understanding biology* models and highlight the role of confounding in this distinction.  
67 Second, by means of an exemplary predictive task we illustrate why and how ignoring causal reasoning while  
68 solely relying on correlative reasoning can lead to biased models and well-known paradoxes such as the  
69 Simpson's Paradox. As a solution, we discuss theoretically how to arrive at *understanding biology* models  
70 with (big) observational data through causal reasoning. We use the introduced real-world predictive example  
71 to illustrate an actionable 5-step approach to arrive at provisional causal models through targeted and informed  
72 deconfounding. Eventually, we discuss that it is particularly hard in the field of biomedical research to define  
73 a set of satisfying causal assumptions because of the inherently multi-dimensionality of biomedical  
74 mechanisms and close with suggestions on how to treat this dilemma.

## 75 2. The necessity for causal reasoning in predictive models and the role of confounders

### 76 2.1. Biomedical questions ultimately ask about the “why” and “how” of a phenomenon of interest

77 In the development of AI-tools, the medical usefulness and clinical trustworthiness of ML models is oftentimes  
78 (solely) judged based on a model's performance – “the higher the accuracy, the better the model”, leading to  
79 a performance race in model development. Problematically, the achieved high performances oftentimes cannot  
80 be replicated under changing conditions. This makes previously high performing models fail in clinical  
81 deployment, i.e. models fail to generalize. The statistical solution is to avoid data distribution<sup>37</sup> and covariate  
82 shifts<sup>38</sup>, by attempting to keep or make distributions of variables the same in the training and testing data.  
83 However, in real-world (medical) use-cases this cannot always be guaranteed. There is the demand for  
84 transportable and adaptable models between settings, i.e. under changing distributions. For example, a useful  
85 model should work in different hospitals, not just in the one on which's data it was trained. The demand is for  
86 models that can be used in the same way as for instance a glucose test, which gives the same results no matter  
87 where it is applied. Independent of the setting, it informs about glucose-tolerance and thereby supports  
88 diagnosis of diabetes. This is different for predictive models. Under new conditions, models must be trained  
89 again to learn a new prediction function as fitting a function to data is ultimately what any type of learning

90 technique can achieve<sup>36</sup>. While the *high performance* model operates based on learned patterns in data, the  
 91 glucose test operates based on the knowledge of the underlying biological mechanism: Sustained higher blood  
 92 glucose level after glucose intake can be caused by insulin resistance, i.e. diabetes type 2. In other words, the  
 93 glucose test works under changing conditions because it is based on knowing the “why” and “how” of the  
 94 biochemical mechanisms underlying diabetes, or put differently, knowing the underlying cause-effect  
 95 relationship. Consequently, what is ultimately desired in biomedical predictive modeling are *understanding*  
 96 *biology* models, that both, incorporate and enhance knowledge on causal biomedical effects. High performance  
 97 aims should build on such causal models, because high performance based on valid biomedical mechanisms  
 98 fosters model generalizability across different settings, which can improve trust in the usage of predictive  
 99 models as biomedical tools.

100 Beyond biomedical models as clinical tools, arguably, biomedical questions often ultimately implicitly - even  
 101 if not formulated explicitly - ask about the *why* and *how* of a phenomenon of interest. Why does person A have  
 102 a higher hand grip strength (HGS) than person B? Why does person A suffer from depression, but a seemingly  
 103 matching person B does not and why is the treatment in patient A successful but not in patient B? The problem  
 104 though is, no matter how big, data are inherently “dumb about questions of why”<sup>36</sup>. The reason is that most  
 105 predictive data-driven models are associative and observational in nature. However, asking *why* is a causal  
 106 question that seeks for understanding of cause-effect relationships between variables. Given the well-known  
 107 fact that correlation is not causation, it becomes clear that one cannot derive medical cause-effect relationships  
 108 from a correlative (associative), observational approach, such as purely data-driven modeling. However, some  
 109 correlations do imply causation. To disentangle if an association between a feature (predictor) and a target  
 110 (outcome) does indeed imply causation, one needs to combine qualitative, causal information with quantitative,  
 111 data information<sup>36</sup>. This does not only apply to causal predictive modeling but also domains such as structural  
 112 equation modeling, i.e. some hypothesized causal structure has to be added to pure quantitative, associative  
 113 interrogations<sup>39</sup>. Integrating causal assumptions can push ML techniques to allow for answering real-world  
 114 *why* questions beyond quantifying associative patterns in data.

| <b>Box 1 – The ladder of causation</b>                                                                                               |                                                                                                  |                                                                             |                                                             |                                                                                                |                                        |
|--------------------------------------------------------------------------------------------------------------------------------------|--------------------------------------------------------------------------------------------------|-----------------------------------------------------------------------------|-------------------------------------------------------------|------------------------------------------------------------------------------------------------|----------------------------------------|
| Causation can be distinguished into three levels of increasing causal insight: Seeing, doing and imagining <sup>36</sup> (Table B1). |                                                                                                  |                                                                             |                                                             |                                                                                                |                                        |
| Table B1. Ladder of causation (adapted from <sup>36</sup> ).                                                                         |                                                                                                  |                                                                             |                                                             |                                                                                                |                                        |
| <b>Ladder Rung</b>                                                                                                                   | <b>Action</b>                                                                                    | <b>Learning Type</b>                                                        | <b>Questions</b>                                            | <b>Examples</b>                                                                                | <b>Gained Insight</b>                  |
| Rung 3                                                                                                                               | Imagining<br> | <b>Counterfactuals</b> ,<br>imaging worlds<br>that do not exist             | What if X had<br>not occurred,<br>would Y have<br>happened? | What if I had not smoked<br>for the last 2 years,<br>would I still have gotten<br>lung cancer? | Understanding                          |
| Rung 2                                                                                                                               | Doing<br>     | <b>Intervention</b> , act<br>by planning and<br>learn from<br>interventions | What would Y<br>be if I do X?                               | If I take aspirin, will my<br>headache be cured?                                               | Causal<br>mechanism                    |
| Rung 1                                                                                                                               | Seeing<br>    | Learning from<br><b>association</b>                                         | How are two<br>variables<br>related?                        | What does a symptom<br>say about a disease?                                                    | Correlative,<br>pattern in the<br>data |

**Rung one** refers to the *seen world*. By investigating how two variables are related, new insights are derived from associations. This resembles the investigation of correlative patterns in data. Rung one analyses can answer observational, associative questions, for example in the 1700s being a sailor was associated with a higher risk of developing scurvy.

**Rung two** requires *doing* or *intervening*. Here, the interest lies in gaining more detailed understanding in cause-effect relationships by changing (intervening on) a predictor (feature) variable X and learning how an outcome (target) variable Y would change as an effect of manipulating X. Interventions allow to get insights into causal mechanisms. In a medical setting RCTs are the established means for interventional investigations. For example intervening on one ship with sailors having citrus fruits while another ship does not have could show that sailors on the citrus-fruit-ship didn't develop scurvy.

**Rung three** deals with a world that cannot be seen because it contradicts what is seen. Deriving insight on rung three requires imagining situations that do not exist, for example "would the outcome (target) Y have happened, if the predictor (feature) X had not occurred"? Rung three allows for not only seeing effects of interventions but understanding cause-effect mechanisms. For example, would a sailor S on the non-citrus-fruit-ship also not have developed scurvy if they (he) had had citrus fruits?

## 115 2.2. Not acknowledging the causal nature of confounders leads to paradoxes

116 Interventions allow to gain insights into causal mechanism beyond associative patterns in data and are therefore  
117 the next step towards answering questions of *why* (**Box 1**). Randomized Control Trials (RCTs) in medical  
118 experimentation are an established method to gain interventional insights because they implicitly take a causal  
119 note (**Box 2**). In contrast, confounder regression in predictive models stays correlative. However, not  
120 acknowledging the causal nature of confounders and other types of 3<sup>rd</sup> variables (**Box 3**) leads to a set of  
121 paradoxes such as Simpson's paradox (confounder bias) or Berkson's paradox (collider bias) (**Box 3**). As an  
122 example consider the supervised prediction of hand grip strength (HGS) from T1w-MRI derived grey matter  
123 volume (GMV) features in a large observational dataset such as the UK Biobank<sup>40</sup> (for methods see  
124 supplementary materials). A *vanilla* model without confounder considerations decently predicts HGS from  
125 parcellated GMV (**Fig. 1a** top). Following common practice of confounder removal, a second model can be  
126 built with linearly regressing out *sex* as a conventionally established confounder (also referred to as 3<sup>rd</sup>  
127 variable) (**Fig. 1a** bottom). Following the above given ubiquitous definition of a confounder as a variable that  
128 correlates with both, the features and the target, this decision could be backed up by the given point biserial  
129 correlation (statistical association) between *sex* and both HGS ( $r=.73$ ) and GMV ( $r=.45$ ) (**Fig. 1b**). The *vanilla*  
130 and the *sex*-adjusted model differ notably in their predictive performance ( $R^2_{\text{vanilla}}=.40$  vs.  $R^2_{\text{sex}}=.03$ ) (**Fig. 1a**).  
131 This high difference suggests that the good predictive performance of the *vanilla* model originated from a  
132 feature-target correlation that only exists without confounder regression. Such correlations – sometimes  
133 referred to as spurious correlations - can arise when two heterogenous populations are aggregated into one<sup>36</sup>,  
134 known as Simpson's paradox. It occurs inter alia when the statistical result of the subgroups differs from the  
135 whole (aggregated) population (**Fig. 1c**) (see **Box 3** for definition). For example a drug happens to be bad for  
136 men and bad for women but good for *people*. In our scenario, a correlation of  $r=.44$  between (unparcellated,  
137 whole brain) GMV and HGS in the aggregated population (male and female) in contrast to  $r_m=.22$  and  $r_f=.15$   
138 in the two groups (**Fig. 1b, d**) suggests that the aggregation of the subpopulations creates a spurious correlation  
139 which the *vanilla* model leverages. In other words, by inappropriately combining two distinct populations  
140 (here: male and female), we created a supposedly good performing *vanilla* model whose success however was  
141 built on sex information, i.e. on a spurious correlation between the features and the target.

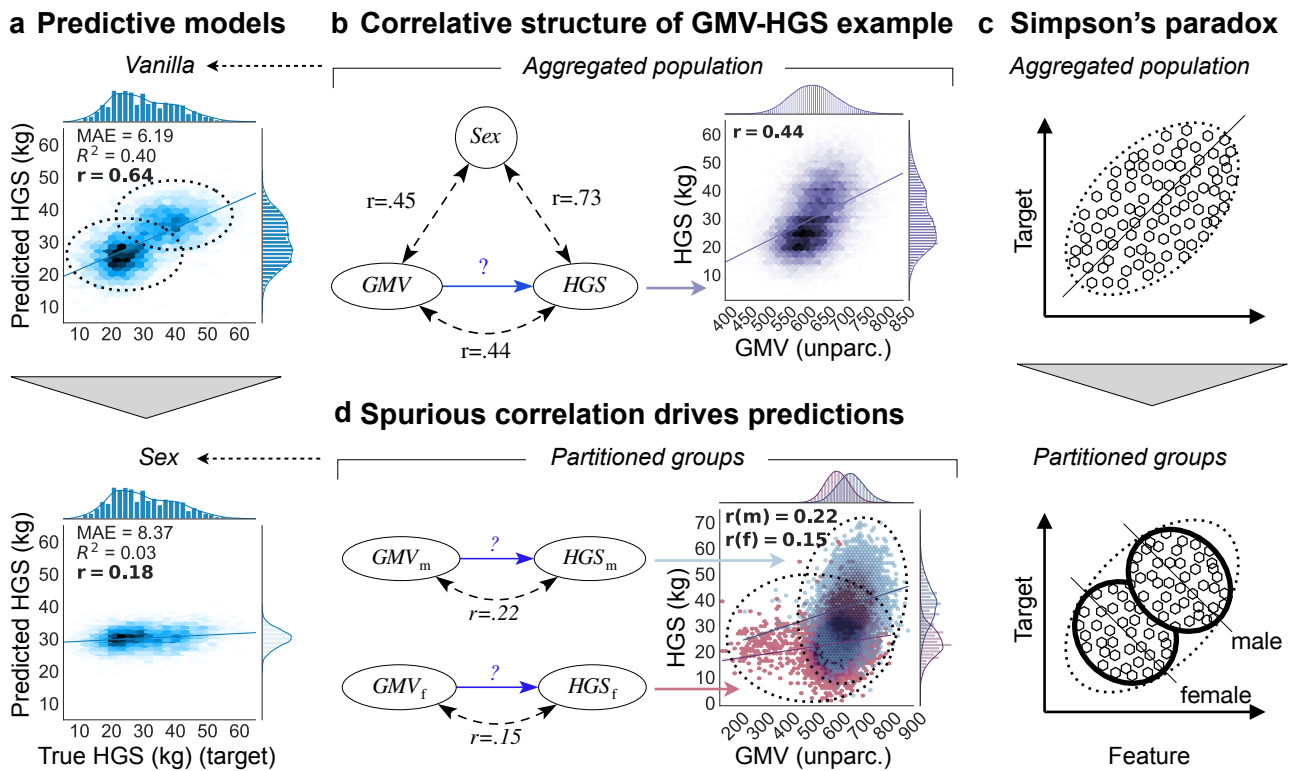

142

143 **Fig. 1. Not acknowledging the causal nature of confounding can lead to paradoxes and spurious**  
 144 **correlations that drive predictions.** a) Supervised prediction of hand grip strength (HGS) from grey matter  
 145 volume (GMV) with no confounder regression (*vanilla*) and regression of sex as confounder. b) Association  
 146 of GMV and HGS in the aggregated population (male and female) with each other and with sex. c)  
 147 Visualization of the Simpson's paradox. d) Association of GMV and HGS separately for males and females.

148 In the above example, partitioning the data seemed to be the right decision. However, aggregating the data (not  
 149 adjusting for a 3<sup>rd</sup> variable) is not always wrong or partitioning the data (adjusting for a 3<sup>rd</sup> variable) is not  
 150 always right. Rather, the right decision depends on the process that generated the data. This process needs to  
 151 be understood individually for each predictive modeling task and this understanding necessitates integrating  
 152 causal structures between variables. The data generating process cannot be revealed by correlative  
 153 considerations alone because the correlative nature of a 3<sup>rd</sup> variable with the feature(s) and the target stays the  
 154 same irrespective of the 3<sup>rd</sup> variable being a confounder, a mediator or a collider, but directionalities  
 155 (causalities) differ (**Box 3**). For example, only given the correlation between GMV, *sex* and HGS (**Fig. 1b**)  
 156 directionalities (i.e. causalities) cannot be distinguished. Consequently, it remains unclear whether *sex* is a  
 157 confounder, a mediator or a collider. The occurrence of the Simpson's paradox when conditioning on  
 158 (regressing out) *sex* suggested that here *sex* is a confounder because this paradox would not have occurred if  
 159 *sex* were a mediator or collider (**Box 3**). Knowing that *sex* is a confounder, one needs to condition on *sex*  
 160 to get insights into the causal path GMV → HGS. In contrast, conditioning on or regressing out a mediator would  
 161 disable the causal path of interest (**Box 3**). Conditioning on a collider would even introduce a spurious  
 162 correlation (Berkson's paradox, **Box 3**), for instance detectable through an increased accuracy. This means that  
 163 conditioning on all statistically associated 3<sup>rd</sup> variables - maybe with a "better safe than sorry"-mindset - can  
 164 lead to wrong insights because the correct decision for conditioning on a variable depends on the causal story  
 165 not on the data. The Simpson's paradox alerts to cases where at least one of the statistical results - either from  
 166 the aggregated data, the partitioned data, or both - cannot represent the causal effects. In the GMV-HGS  
 167 example, the aggregated data does allow to investigate if GMV causes HGS.



## Box 2 – Concepts and Terminologies for Causal Investigations

Investigations on causal inference require formal representation of causal concepts and assumptions. Causal diagrams or directed acyclic graphs (DAG), are used to express the known causal assumptions (“what we know”). Symbolic language supplements these diagrams by expressing the causal relationship to be found (“what we want to know”)<sup>36</sup>.

### DAG: directed acyclic graph – “What we know”

A DAG is a circle-arrow picture. The circles represent variables, and the arrows represent directions of known or suspected causal relationships between two variables.  $X \rightarrow Y$  in a DAG would mean that X is a direct cause of Y, i.e. the arrow implicitly says that some probability rule or function specifies how Y would change if X were to change or simplified, “Y listens to X”. The rule according to which this change happens might either be known (e.g. previous research) or has to be estimated from data. However, often the structure of the DAG itself already enables to estimate causal relationships (simple or complicated, deterministic or probabilistic, linear or nonlinear). For example, a barometer reading B tracks the atmospheric pressure P. We know that it is the pressure P that causes the barometer reading to change, i.e.  $P \rightarrow B$ , and not the other way around. The mere formula  $P=B/k$  wouldn’t have revealed this causal directionality. Hence, a DAG depicts qualitatively the cause-effect forces that operate in the environment and that shape the data generated<sup>36</sup>.

### Formal probabilistic language and the do-operator - “What we want to know”

#### *Types of probabilities*

1. **P(S=s)**: The probability of the Variable S taking the value s. E.g. the probability of people in a café ordering scones.
2. **P(T=t, S=s)**: The probability of simultaneously T taking the value t and S taking the value s. E.g. the probability of people in a café ordering scones and tea.
3. **P(T=t | S=s)**: The probability that T=t conditional on finding S=s, i.e. the population distribution of T among individuals whose S value is s. E.g. the probability of people who have ordered scones to also order tea.  $\Rightarrow$  a distribution based on an observation.
4. **P(T=t | do(S=s))**: The probability that T=t when we intervene to make S=s, i.e. the population distribution of T if everyone in the population had their S value fixed at s. E.g. the probability to order tea when the person was “forced” to order scones.  $\Rightarrow$  do(s) creates a distribution by an intervention.

#### *Medical example using probabilistic language to express a causal question (query)*

Question: What is the effect of a drug (D) on lifespan (L)?

Formal expression:  $P(L | do(D))$

In words: What is the probability (P) that a typical patient would survive L years if made to take the drug?

The do-operator formalizes interventional (treatment) questions and hence corresponds to what is measured in clinical trials. The “control” patients in the above example would be described as  $P(L | do(not-D))$ . It is important to note that  $P(L | D)$  may be different from  $P(L | do(D))$ .  $P(L | D)$  notes the observed probability of Lifespan L among patients who voluntarily take the drug (D) (standard conditional probability), while  $P(L | do(D))$  is the probability of Lifespan L of patients made to take the drug. It is hence the fundamental difference between seeing and doing. In the barometer example from above, seeing the barometer reading (B) to fall increases the probability of a storm (lower atmospheric pressure) ( $P(P | B)$ ). However, forcing the barometer read to fall does not affect the probability of a storm ( $P(P | do(B))$ ). This means that  $P(P | B) \neq P(P | do(B))$ .

### Randomized Control Trials (RCTs)

In an RCT a treatment  $X$  is randomly assigned to some individuals (treatment group), but not to others (control group). If there are differences in an outcome variable  $Y$ , they are attributed to the treatment (intervention) and one can claim that “ $X$  causes  $Y$ ”. RCTs are an interventional approach and thereby enable deriving cause-effect relationships (**Box 1**). This is supported by the crucial aspect of randomization of group assignment in RCTs. Randomization rules out influential factors on the outcome  $Y$  beside the treatment of interest  $X$ . Speaking in the terminology of DAGs and the do-operator, randomization erases all arrows that come into  $X$  and thereby prevents information about  $Y$  from flowing in the non-causal direction<sup>36</sup>. Conveniently, randomization even controls for confounders that cannot be observed, measured or named. This makes randomization not only an effective tool to erase confounding effects but makes RCTs in medical experimentation often seen as the *gold standard* for cause-effect investigations.

168

### Box 3 – Types of 3<sup>rd</sup> variables and associated biases

When investigating the relationship between a predictor (feature)  $X$  and an outcome (target)  $Y$ , a 3<sup>rd</sup> variable  $Z$  can be related to  $X$  and  $Y$  in different ways. The different natures can be best visualized by using directed acyclic graphs (DAGs) (**Box 2**).

#### Confounding

Confounding can be expressed in the form of a causal diagram or formal language (**Box 2**). A confounder  $Z$  is a (direct or indirect) common cause of the feature (predictor)  $X$  and the target (outcome)  $Y$ .

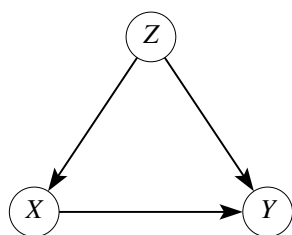

Fig. B3.1 DAG of a confounder  $Z$ .

Formally, a confounder can be defined as a variable  $Z$  that leads to a discrepancy between the conditional probability of  $Y$  given  $X$  (*seeing*) and the probability when intervening on  $X$  (*doing*):

$$P(Y | X) \neq P(Y | do(X)) \quad (\text{B3.1})$$

In the lifespan-drug example from **Box 2** that means that one must ensure that the observed change in Lifespan  $L$  is due to the drug itself ( $do(D)$ ) and is not confounded with other factors  $Z$  that tend to shorten or lengthen life. If, instead of intervening, the patient had decided by themselves whether to take the drug ( $P(L | D)$ ), those other factors  $Z$  might influence their decision and lifespan differences between taking and not taking the drug would no longer be solely due to the drug.

Not controlling for a confounder will obscure the causal effect of  $X$  on  $Y$ . One can either control for the confounder itself or any variable that lies on the path  $X \leftarrow Z \rightarrow Y$ .

#### Other variable types that can lead to biases: Collider – Mediator – Proxy

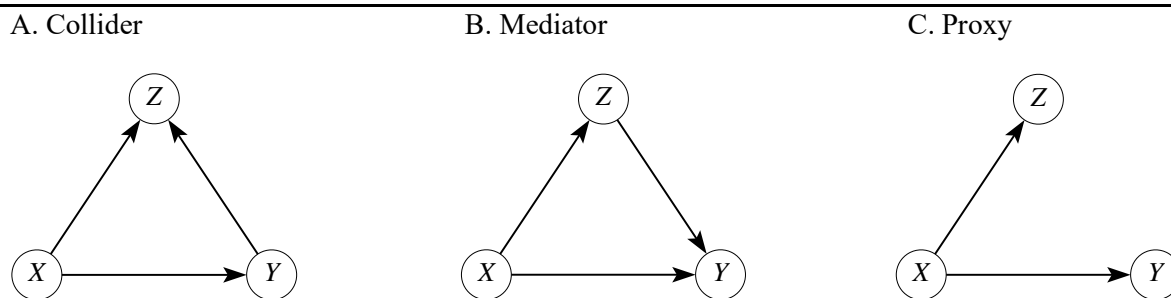

Fig. B3.2 DAG of a collider (A), a mediator (B) and a proxy (C).

A **collider**  $Z$  is the common effect of a predictor  $X$  and a target  $Y$ . Conditioning on a collider induces a spurious (i.e. non-causal) association between  $X$  and  $Y$  (Berkson's paradox)<sup>41-43</sup> (Fig. B2.2A). In other words, if  $X$  and  $Y$  were independent to begin with, conditioning on  $Z$  will make them dependent (see Berkson's paradox for an example).

A **mediator**  $Z$  is caused by  $X$  and is a cause of  $Y$ <sup>44-46</sup>. For example blood pressure might mediate the relationship between a drug and the risk for a heart attack such that the drug decreases the risk for a heart attack via lowering blood pressure. When interested in the total effect of the predictor on the outcome ( $X \rightarrow Y$  and  $X \rightarrow Z \rightarrow Y$ ), conditioning on  $Z$  blocks the causal path  $X \rightarrow Z \rightarrow Y$  and will hence only reveal a partial effect. When only interested in the direct effect  $X \rightarrow Y$  conditioning on  $Z$  can nonetheless lead to biased estimates, if the mediator and the outcome share a common cause because then the mediator is a collider for the predictor and this common cause.

A **proxy**  $Z$  is caused by  $X$  but has no causal relation to  $Y$ <sup>39</sup>. If the predictor  $X$  is a perfectly reliable measure of the construct of interest, then controlling for a proxy will not affect the path  $X \rightarrow Y$ . However, in many disciplines  $X$  is an unreliable measure of the true causal variable, e.g. a MRI scan for the underlying morphology. In this case, the proxy is a second unreliable measure of the same true predictor (e.g. morphology) and conditioning on this proxy will partition the true predictive effect between the two unreliable proxies so that neither of the unreliable measures will capture the full causal effect<sup>29</sup>.

*Note:* Defining confounding via correlations and not as a causal note is not sufficient because each of the causal structures A.-C. produces a correlation between  $Z$  and both  $X$  (predictor) and  $Y$  (outcome), which could all produce the same correlation matrix. Consequently, correlations cannot help to distinguish between a confounder, a collider or a mediator<sup>47,48</sup>.

### Types of biases (paradoxes) associated with 3<sup>rd</sup> variables

#### Simpson's paradox (confounder bias)

Simpson's paradox is a statistical phenomenon in which the statistical relationship between two variables in a population can appear, disappear, or reverse when splitting the population in subgroups or when aggregating two heterogeneous subgroups into a population. For example, two variables might be positively associated in the overall population but either not or negatively associated within the subgroups<sup>49</sup>. More generally, it is characterized by the statistical results of the subgroups differing from the aggregated population. It alerts to cases where at least one of the statistical trends (either in the aggregated data, the partitioned data, or both) cannot represent the causal effects<sup>36</sup>.

#### Berkson's paradox (collider bias)

Berkson's paradox is the opposite of the Simpson's paradox, i.e. it occurs when falsely conditioning on a variable that is the effect of both the feature(s) and the target (collider). Conditioning on such a collider creates a spurious association between the feature(s) and the target. For example, performing a study on patients who are hospitalized, one controls for/conditions on hospitalization. However, if only a disease



1 and a disease 2 together could lead to hospitalization in the first place (with no causal relation between the diseases), conditioning on hospitalization (by performing the study only on hospitalized patients) would introduce non-existing relation between disease 1 and disease 2.

169 To answer questions of *why* with predictive models, it is not enough to consider associative (correlative)  
170 patterns in the data. It is essential to additionally acknowledge directionalities, i.e. the cause-effect structure  
171 between relevant variables. Among such relevant variables, it is crucial to carefully distinguish between  
172 different types of 3<sup>rd</sup> variables to identify confounders (**Box 3**). Considering either a standard set of variables  
173 or *every conceivable* 3<sup>rd</sup> variable as a confounder can lead to biased models if these variables in fact were a  
174 mediator, collider or proxy. Through randomization, RCTs disable a correct set of confounders without  
175 introducing new confounders and thereby implicitly have a causal reasoning integrated by design (**Box 2**).  
176 However, RCTs are often not feasible for a variety of reasons, such as ethical concerns, interest in population-  
177 based insights or individual-level predictions (precision medicine). To achieve RCT-like causal insights with  
178 predictive models (**Box 1** rung 2), one must find a means to purposefully integrate causal reasoning when  
179 building predictive models.

### 180 **3. A 5-step approach to identify valid deconfounders in causal predictive modelling**

181 The core mechanism for integrating causal reasoning into a predictive model is through the identification of  
182 and adjustment for a correct set of deconfounders (see **Box 4** for definition). Identifying such a correct set of  
183 deconfounders requires a causal analysis around the cause-effect relationship of interest. This causal analysis  
184 relies on domain knowledge about the process that generates the observed data. The causal analysis results in  
185 a causal diagram or directed acyclic graph (DAG) (**Box 2**), which allows to identify different possibilities for  
186 confounder adjustment. For easy transferability to any kind of research project, we in the following describe a  
187 5-step approach to identify a correct set of deconfounders (**Fig. 2**). We exemplify each theoretical step with  
188 the previously introduced neuroimaging GMV-HGS prediction example.

#### 189 **3.1. Step 1 and step 2 - Prerequisites and the causal question**

190 In step 1, the *general predictive aim*, such as the out of sample (OOS) prediction of HGS from GMV, is the  
191 basis for formulating the *causal aim*, for example if GMV causes changes in HGS (**Fig. 2**, step 1).

192 In step 2, the causal question refines the causal aim by adding more detailed as well as interventional or  
193 counterfactual assumptions (**Fig. 2**, step 2). The causal question expresses the interest in the direct cause-effect  
194 relationship of a feature (predictor)  $X$  on a target (outcome)  $Y$ , i.e.  $X \rightarrow Y$ . For example, if an individual  
195 managed to increase their GMV, would that make their hand grip stronger ( $GMV \rightarrow HGS$ )? This causal  
196 question requires a causal predictive model because neither a direct interventional approach such as an RCT  
197 nor a counterfactual approach is possible (**Box 1**). One cannot experimentally manipulate the volume of grey  
198 matter of a participant with the hope to observe if this manipulation of volume will lead to changes in HGS  
199 (interventional). Even less, it is not possible that one could change GMV and not change the GMV at the same  
200 time in the same individual (counterfactual). Additionally, one might be interested in individual-level, i.e. out  
201 of sample predictions. We here focus on an interventional causal predictive model.

#### 202 **3.2. Step 3 - Performing the causal analysis to build a causal diagram and identify deconfounders**

203 Step 3 consists of creating a DAG around the hypothesized direct cause-effect relationship  $X \rightarrow Y$ . The DAG  
204 is built through a causal analysis that determines influential factors on both  $X$  and  $Y$ . The causal analysis starts  
205 off by asking about known and conceivable causes of the target  $Y$  and then repeats the question for  
206 subsequently added 3<sup>rd</sup> variables (**Fig. 2**, step 3). The answers can be found from previous research and rely  
207 on domain-expert knowledge that translates into cause-effect *arrow*-information. This procedure creates a  
208 DAG in a bottom-up way. For example, known direct causes of HGS could be *lower arm/upper body muscle*  
209 *mass* (muscle mass  $\rightarrow$  HGS) and the muscles' supply of oxygen and nutrients (oxygen supply  $\rightarrow$  HGS).  
210 Additionally, GMV is the conceivable cause of HGS to be investigated ( $GMV \rightarrow HGS$ ). In the next iteration,  
211 known or conceivable causes of *muscle mass* could be *sex hormones*, *eating behaviour*, *strength training*, *age*  
212 etc.. The feature GMV is influenced by *TIV*, age, *sex hormones* and further - potentially unmeasurable or

213 unobserved - environmental and behavioural factors. This bottom-up procedure is continued until the DAG  
214 contains enough information to determine a suitable deconfounding strategy<sup>1</sup> (**Fig. 3a**, **Box 4**).

215 There are three essential aspects to keep in mind, when building a DAG. First, the feature must be included as  
216 a potential cause of the target as this is the goal of the causal question. Second, an omitted arrow restricts the  
217 assumed causal effect to zero, while a present arrow remains agnostic about the magnitude of the causal effect  
218 of the causal effect. Therefore, not putting an arrow can imply a more precise statement about the cause-effect  
219 relationship of two variables than putting an arrow. Third, the DAG relies on established cause-effect  
220 relationships but can, and oftentimes must, also be based on ambiguous cause-effect assumptions, for example  
221 when there is not yet enough existing causal domain-knowledge. Consequently, there can exist several DAGs  
222 for the same causal question. Even though it can be ambiguous, performing a causal analysis is nonetheless  
223 beneficial. Formalizing made assumptions with a DAG enables transparent communication. Additionally, the  
224 DAG provides a basis for interpreting the resulting “provisional causal”<sup>36</sup> insights gained by the predictive  
225 model. Provisional causality thereby means causality contingent upon the set of assumptions that the DAG  
226 advertises. Eventually, the causal analysis forces a researcher to precisely *think* about the to-be-answered  
227 question and to formalize the causal assumptions.

228 In contrast to a pure correlative analysis, the DAG reveals the distinction of confounding pathways from  
229 colliders and mediators (**Box 3**) and enables a variety of deconfounding strategies (**Box 4**). Correct  
230 deconfounding thereby is *the* means to allow predictive models to give provisional causal insights. A correct  
231 set of deconfounders can be identified from a DAG either by following the graph rules or by employing  
232 available (online) tools (e.g. DAGitty<sup>50</sup> or CausalFusion (<https://causalfusion.net>)). The DAG for the GMV-  
233 HGS example contains 10 confounding, i.e. non-causal pathways (**Fig. 3b** red arrows). According to the  
234 “backdoor criterion”<sup>36</sup> (**Box 4**) all 10 non-causal pathways between GMV and HGS can be blocked when  
235 adjusting for the deconfounders *sex-hormone levels* and *age*.

236 In the selection of confounders for predictive modelling it can be challenging to know when and if **all** relevant  
237 confounders were identified. This uncertainty can be solved through the concept of deconfounders – in contrast  
238 to confounders – in combination with the suggested bottom-up causal analysis. Building the DAG bottom-up  
239 allows to identify the point where adding more variables to the DAG does not add more useful information.  
240 This point is reached when a set of sufficient deconfounders, blocking the non-causal pathways, can be  
241 identified. For example, specifying  $U_2$  more precisely in the DAG illustrated in **Fig. 3a** would not give any  
242 information gain with respect to the causal question of interest (GMV  $\rightarrow$  HGS).

---

<sup>1</sup> *Note*: Strategy here does not refer to the kind of statistical tool to use to correct for confounding signals, e.g. linear regression, but to different ways of choosing a right set of deconfounders based on a DAG as described in **Box 4**.

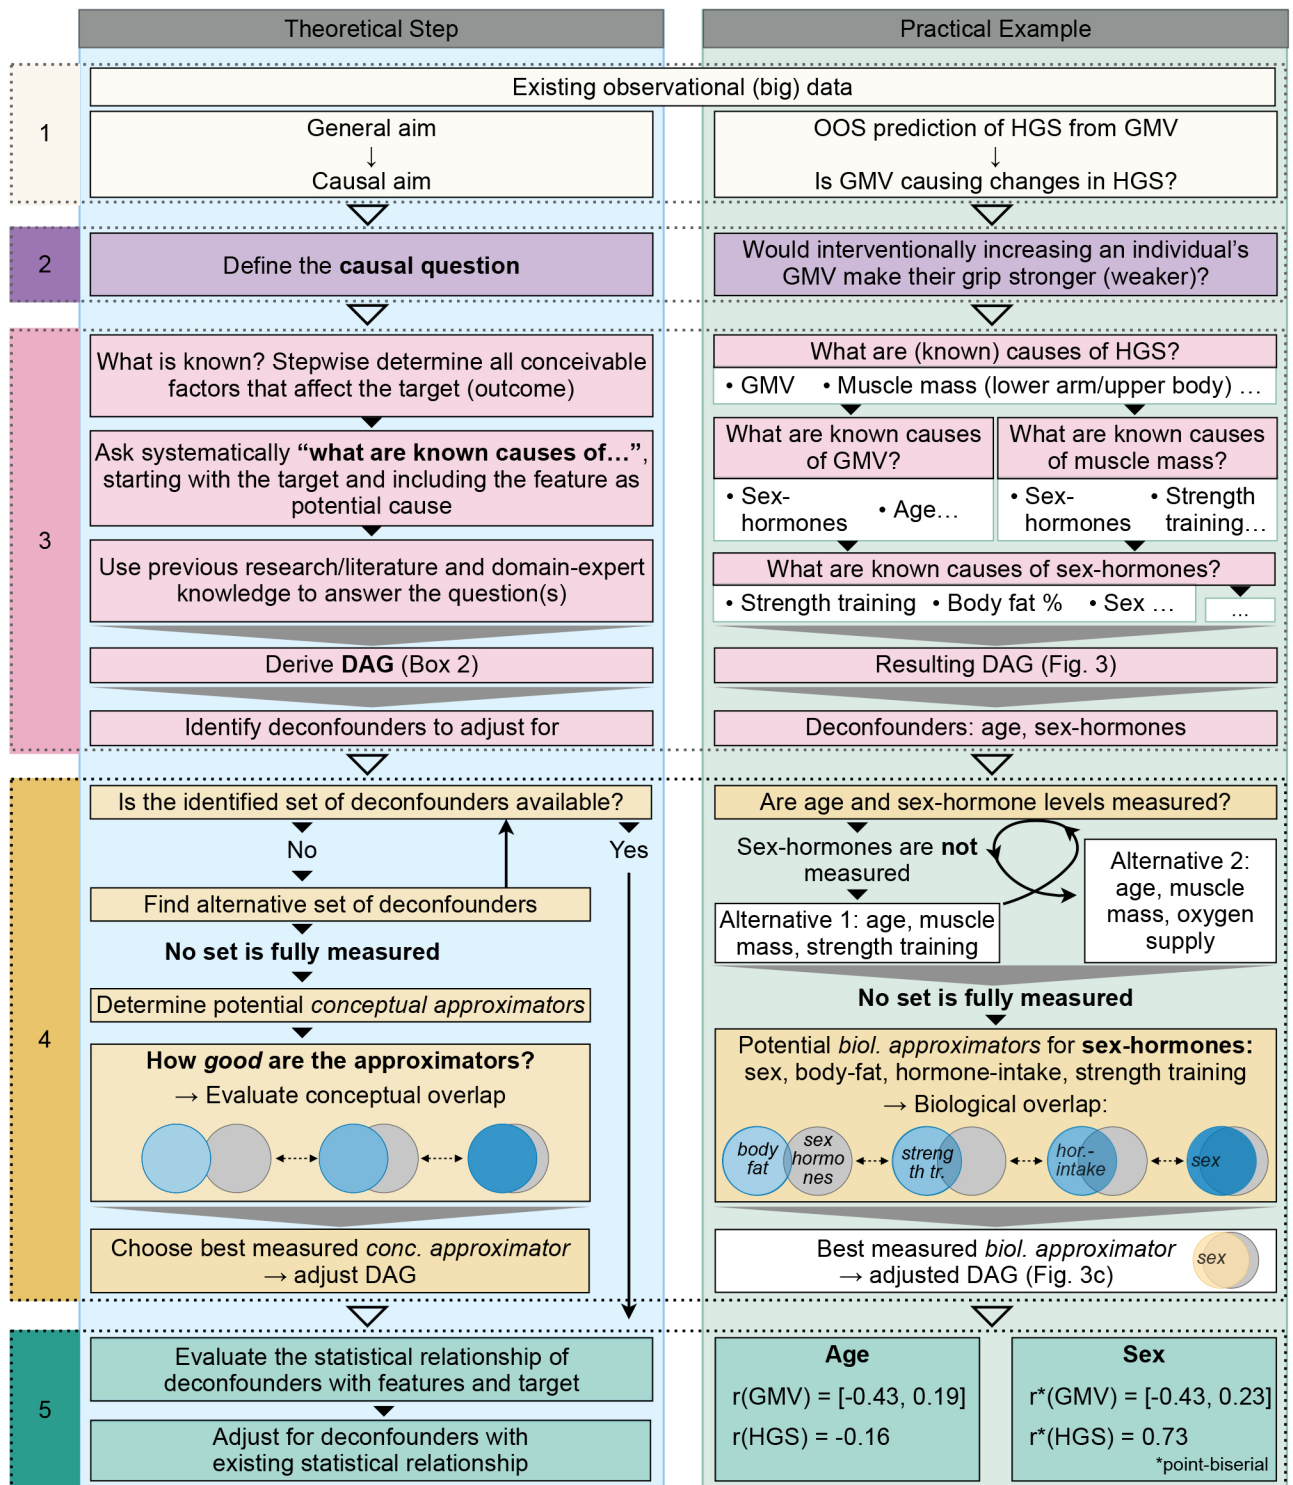

243

244 **Fig. 2. 5-step recipe for confounder adjustment in causal predictive modelling.** The five steps include  
 245 prerequisites (0), definition of the causal question (1), causal analysis resulting in a DAG and the definition of  
 246 a minimal set of deconfounders (2), if needed the identification of an alternative set of deconfounders or the  
 247 replacement of a deconfounder with a conceptual approximator (3) and the statistical evaluation of the  
 248 identified deconfounders (4). Each step is explained theoretically (left) and by means of the example prediction  
 249 of hand grip strength (HGS) from grey matter volume (GMV).

250

### 251 3.3. Step 4 - Strategies if not all identified deconfounders are available

252 When relying on existing observational (big) data, some of the identified deconfounders might not be available,  
253 for example *sex-hormone levels* in the example prediction. In such a case, in step 4 the DAG can either reveal  
254 an alternative sufficient set of deconfounders for which all variables are measured or the “frontdoor criterion”<sup>36</sup>  
255 can be applied (**Box 4**). The DAG for the GMV-HGS example (**Fig. 3b**) reveals that there is neither a fully  
256 measured alternative set of deconfounders available (**Fig. 2**, step 4) nor can the frontdoor criterion be applied.  
257 The latter can easily happen in the field of neurobiomedicine, where it can be challenging to almost impossible  
258 to find a deconfounding variable Z that unambiguously fulfils all three necessary criteria for the frontdoor  
259 criterion (**Box 4**). For example, given a neuroimaging derived feature such as GMV, there is no variable for  
260 which it can be unambiguously said that it is caused by GMV, and *only* GMV, and that at the same time is a  
261 cause of HGS (criterion a and b). The underlying reason is the multi-dimensionality of neurobiomedical  
262 phenomena.

263 The third alternative option in step 4 is the use of a *conceptual approximator*, which makes use of the  
264 aforementioned multi-dimensionality. Different neurobiomedical measurements might measure a somewhat  
265 similar underlying biological concept, yet still different aspects thereof. For example, *sex* and *sex hormones*  
266 express almost the same underlying biology but are nonetheless different measures that also contain non-  
267 overlapping biological information: Strength training influences sex-hormone levels<sup>51,52</sup> or body-fat tissue can  
268 be hormonally active<sup>53</sup> but neither of them changes the biological sex. One can make use of this multi-  
269 dimensionality and overlap in biological information to identify a *biological approximator* as replacement for  
270 an unmeasured deconfounder. For instance, here *sex* is the best suited *biological approximator* for the  
271 unmeasured deconfounder *sex hormone levels*. The causes of the unmeasured deconfounder thereby serve as  
272 candidate *conceptual (here: biological) approximators* which are evaluated based on their conceptual (here:  
273 biological) information overlap with the unmeasured variable (**Fig. 2**, step 4).

274 It is important to note that the *conceptual approximator* cannot directly replace the original deconfounder. The  
275 DAG must be modified after replacement because the *conceptual approximator* can change the previously  
276 determined cause-effect structure. For example, *strength training* can influence *hormone levels*, but it will not  
277 affect the *sex* of a person, which leads to a change in the structure of the DAG (**Fig. 3c**). After modification  
278 there are two pathways confounding GMV→HGS (**Fig. 3c**). They can either be blocked by adjusting for *age*  
279 and *sex* or by adjusting for *age*, *muscle mass* and *oxygen supply/strength training*. This makes *age* and *sex* the  
280 minimum correct set of deconfounders for which all variables are measured under the usage of a *biological*  
281 *approximator*.



**a DAG from causal analysis**

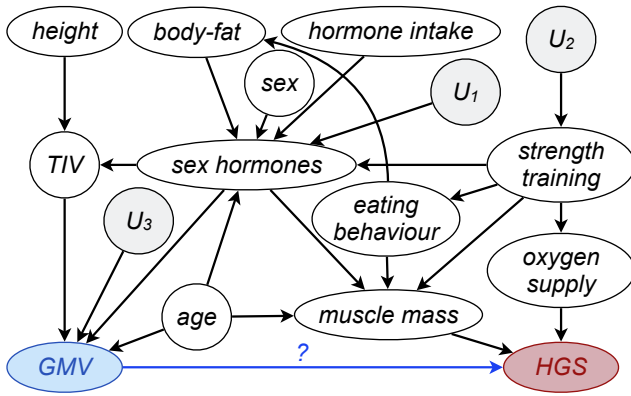

**b Confounding paths**

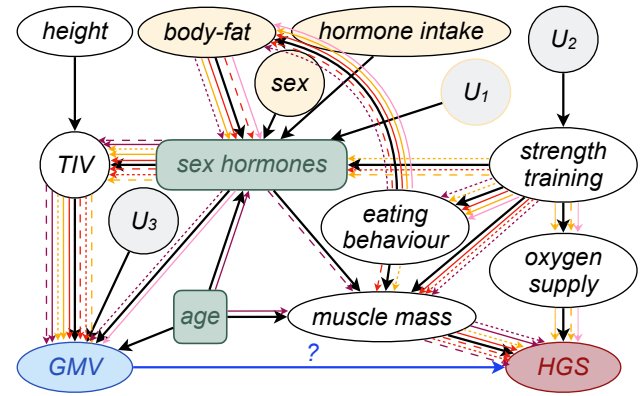

**c DAG with biological approximator**

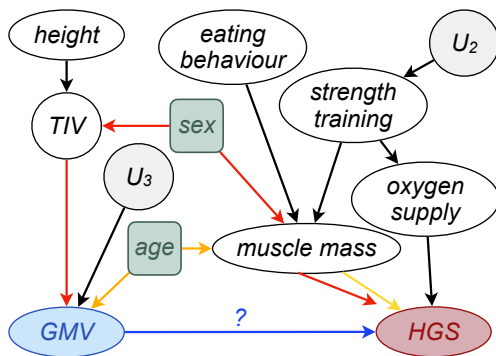

**d Statistical evaluation**

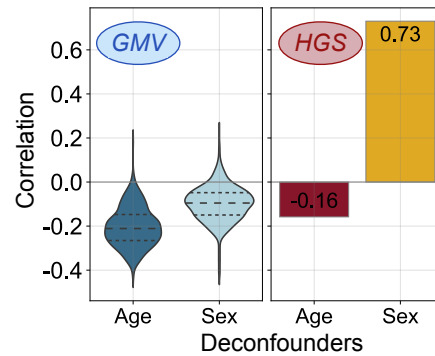

**e Final model**

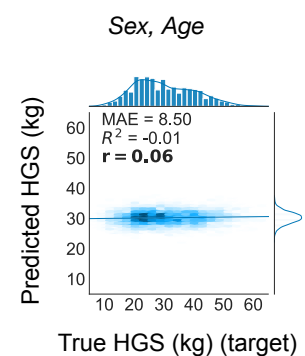

282

283

284

285

286

287

288

**Fig. 3. Practical illustration of 5-step approach with the GMV → HGS predictive example.** a) Resulting DAG from a causal analysis. b) *Sex hormones* and *age* (green) qualify as minimum set of correct deconfounders to block all 10 non-causal (confounding) pathways (red arrows) between GMV and HGS. The causes of *sex hormones* (yellow) qualify as candidate *conceptual approximators* for the unmeasured deconfounder.

**Box 4 – Ways to account for confounding influences based on DAGs.**

Once the underlying causal structure of a causal question was specified in the form of a DAG, there are three ways to identify and account for confounding influences.

Backdoor criterion

A backdoor path is any path from X to Y that starts with an arrow pointing into X, for example  $X \leftarrow Z \rightarrow Y$  in Fig. B4.1A. Backdoor paths are *non-causal* paths. To deconfound X and Y one needs to block every *non-causal* path between X and Y without blocking or perturbing causal paths. This can be achieved by adjusting for variables with an incoming arrow into X based on the respective DAG (Fig. B4.1A). These variables are called deconfounders and can differ from the set of confounders. Confounders and deconfounders can differ for example when a confounder does not need to be controlled for because the backdoor path is already blocked by a collider (Fig. B4.1B) or when the actual confounder is unmeasured, but the backdoor path can be blocked by controlling for a measured deconfounder (Fig. B4.1C). RCTs block the non-causal pathways through randomization. Therefore, when picking the right set of deconfounders, statistical adjustment has the same effect as the randomization in RCTs.



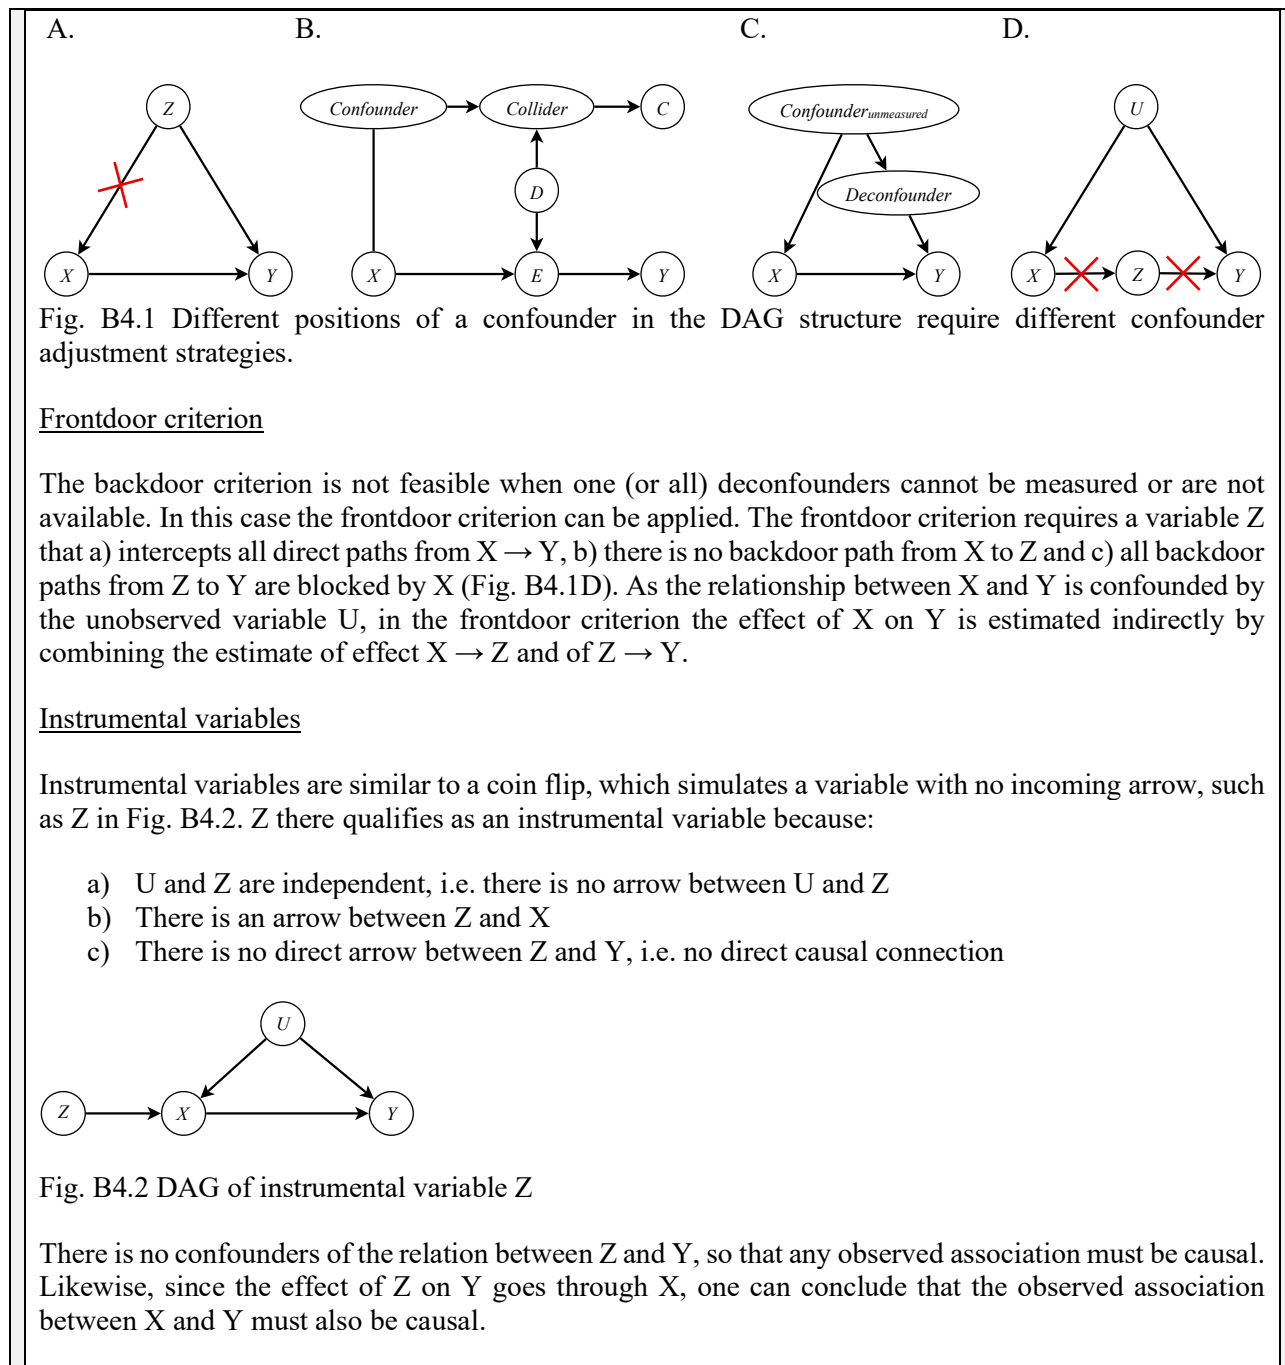

289 **3.4. Step 5 - Combining causal and statistical information**

290 Confounders are often defined as any variable that correlates with the feature (predictor)  $X$  and the target  
 291 (outcome)  $Y$ . In line with previous works (e.g.<sup>29,36,39,48</sup>), we challenged this *pure* statistical note on confounding  
 292 and highlighted that correlation does not imply causation. However, causation only becomes relevant when a  
 293 correlation exists (**Box 1**). We nonetheless put the causal analysis first because this allows for a bottom-up  
 294 identification of deconfounders in contrast to a top-down pre-definition of confounders that creates insecurities  
 295 about what confounders to include. By evaluating the statistical relationship of the causally, i.e. knowledge-  
 296 derived deconfounders with  $X$  and  $Y$ , step 5 combines the associative (statistical) and the causal perspective  
 297 (**Fig. 2**, step 5).

298 Only deconfounders which are statistically and causally relevant must be adjusted for in the predictive model  
 299 (**Fig. 4**), in our scenario *sex* and *age* (**Fig. 3d**). The threshold for what is considered a sufficient statistical  
 300 association should be determined based on knowledge about typical association strengths in the domain and is

301 a question with no strict answer, comparable to other statistical approaches where conventional thresholds are  
 302 set (e.g.  $p=0.05$  in null hypothesis testing). Deconfounders with no statistical relationship should not be  
 303 adjusted for as they are in the best case irrelevant but in the worst case would bias the model by leaking  
 304 information from the deconfounder into the feature or target in the adjustment process<sup>54</sup> (**Fig. 4**). Importantly,  
 305 it is also indispensable that there is a statistical association between X and Y (**Fig. 1b**). Otherwise it is not  
 306 meaningful to evaluate if this statistical association (e.g. predictability) does imply a causal connection through  
 307 the presented causal deconfounding approach. Deconfounders with a statistical but no causal connection are  
 308 irrelevant because they would not have become part of the set of valid deconfounders based on the causal  
 309 analysis (**Fig. 4**). For example *length of working week in the main job* correlates with HGS by  $r_{\text{Pearson}} = -0.24$   
 310 and with parcelated GMV in a range of  $r_{\text{Pearson}} = [-0.11, 0.09]$  but is not part of the DAG. Adjusting the  
 311 predictive model with the final set of deconfounders leads to a model that allows for provisional causal insights.  
 312 The *sex* and *age* adjusted GMV→HGS model therefore allows for the provisionally causal insights that GMV  
 313 is no linear<sup>2</sup> causal predictor of HGS (**Fig. 3e**, see supplementary materials for methods).

| Variables with ...         | Causal relation - no                                                              | Causal relation - yes                                                   |
|----------------------------|-----------------------------------------------------------------------------------|-------------------------------------------------------------------------|
| Statistical relation - yes | ... will <b>not</b> appear in DAG<br>→ do not adjust for                          | Is the variable in the set of deconfounders? <b>Yes</b><br>→ Adjust for |
| Statistical relation - no  | ... are <b>irrelevant</b> for investigating the causal aim<br>→ do not adjust for | ... have <b>no shared signal</b><br>→ do not adjust for                 |

314 **Fig. 4. Combining causal and statistical information on deconfounders can technically lead to four**  
 315 **different scenarios.** Only deconfounders that play a statistical and causal role for the predictive aim should  
 316 be adjusted for.

#### 317 4. Discussion

318 Predictive neurobiomedical models suffer from a lack of generalizability and replicability fueled by a race for  
 319 high performance models. We here argue that the field needs more models that aim to deepen the understanding  
 320 of causal neurobiomedical mechanisms. A key mechanism to achieve causal predictive models is correct  
 321 confounder adjustment. We proposed a 5-step approach to correctly identify deconfounders based on the  
 322 combination of causal and statistical investigations. Incorporating causal domain knowledge (possibly  
 323 supported by large language models, i.e. non-ML AI) about the data generation process into a machine learning  
 324 model by means of a causal analysis enables to obtain enriched models beyond what is possible by purely data-  
 325 driven approaches. Proper deconfounding thereby enhances the understanding of biomedical mechanisms and  
 326 supports the building of reliable (and trustworthy) medical AI tools.

327 The causal analysis forms the core of causal predictive modelling. If a complete DAG can be derived from this  
 328 causal analysis, employing methods for deconfounding are straight forward (**Box 4**). However, the multi-  
 329 dimensionality of neurobiomedical processes can impede the generation of a complete and unambiguous  
 330 causal diagram. Given that the DAG originates from best knowledge based on literature and domain expertise,  
 331 this ambiguity makes the decision on a final structure of the DAG to some extent subjective. The causal  
 332 assumptions nonetheless enable causal insights through targeted confounder control. Those causal insights  
 333 may be labelled provisional causality because they hold true under the set of assumptions expressed in the  
 334 DAG. The remaining uncertainty for the causal claims remains as high as the possibility that further existing  
 335 causal relationships and confounders were not considered. Even though provisional – by adding some causality  
 336 to the system one gains more causal insights.

337 A model that provides provisional causality supports answering questions of *why*, which is arguably the  
 338 ultimate goal of most neurobiomedical investigations. For example, why does person A have a higher HGS

<sup>2</sup> Usage of a linear algorithm for the prediction (see methods in supplementary materials).

339 than person B? The DAG in **Fig. 3a** represents the known and assumed answers to this question based on  
340 literature. For example, person A has a higher HGS because person A has more muscle mass. The results from  
341 the provisional causal model inform us that given a linear model (**Fig. 3e**), no variance ( $R^2 = -0.01$ ) in HGS  
342 can be explained by changes in GMV. This means, that based on the assumed DAG and under the employment  
343 of a *biological approximator*, GMV is no linear<sup>3</sup> cause of HGS, i.e. person A is not stronger because of a  
344 higher/lower volume in grey matter. Such a result may be disappointing: One must perform a timely causal  
345 analysis that is potentially incomplete and subjective, the determined confounders are *sex* and *age*, for which  
346 one might have adjusted anyway, and the resulting model performance may be lower than hoped for. However,  
347 there is an important gain from the investigation: A deeper understanding of a neurobiomedical mechanism.

348 The causal analysis can be incomplete and to some extent ambiguous, but it allows for the formalization of  
349 assumptions and enables the skilful interrogation of nature. Knowing the set of assumptions behind a prediction  
350 through such formalization is not less valuable than attempting to circumvent those assumptions with an  
351 empirical interventional approach such as an RCT. Additionally, an uncertain answer to the right question is  
352 more helpful than a highly certain answer to the wrong question. The causal analysis is motivated by building  
353 models that help to better understand neurobiomedical mechanisms. It is needed when one aims to build  
354 explainable AI that asks to understand nature or models that are generalizable to new settings. An uncertain  
355 answer, i.e. a low performing model, that however helps to answer questions of *why* of neurobiomedicine, is  
356 therefore more helpful in the long-term than a high performing model for which it is ambiguous what it means  
357 and what questions it answers. Therefore, the low predictive performance of the provisional causal model  
358 should not distract from the fact that one learned something about the original causal question, in the example  
359 prediction if interventionally increasing an individual's GMV would make their grip stronger. Assuming there  
360 was a small predictability, analysing the feature importances that were driving such a model's predictions  
361 would be informative, for example revealing what brain areas' GMV are causing stronger HGS. In contrast,  
362 the high performing *vanilla* model from **Fig. 1a** does not allow to derive any conclusions about the cause-  
363 effect relationship between GMV and HGS. Therefore, it can be better to learn a small effect about a  
364 neurobiomedical mechanism of interest than learning a big effect, which's neurobiomedical meaningfulness  
365 however remains unclear and that may lead to false conclusions and misinterpretations.

366 The causal analysis in combination with the use of a *biological approximator* identified *sex* and *age* as  
367 deconfounders to adjust for in the GMV-HGS example. The multi-dimensionality of neurobiomedical  
368 mechanisms not only allows for the use of *biological approximators*, but it also explains why *sex* and *age* are  
369 the two most commonly considered deconfounders. *Sex* and *age* are comparably robust and biologically well-  
370 explainable concepts<sup>4</sup>, that are often at the beginning of a chain of cause-effect relationships. Thereby, they  
371 exhibit a considerably strong biological overlap with many other variables. This makes them a coarse, but – to  
372 a varying degree – valid *biological approximator* for other variables further down a cause-effect chain. Here,  
373 *sex* served as a *biological approximator* for *sex hormone levels*. When neglecting more fine-grained cause-  
374 effect relationships, *sex* could even serve as a *biological approximator* for e.g. *muscle mass*, because males in  
375 average have more muscle mass than females. However, the coarser the *biological approximator*, the more it  
376 prevents a fine-grained, in depth investigation of the causal question. A coarse *biological approximator* thereby  
377 fosters the use of generic average mechanisms, contradictory to the goal of individualized predictions through  
378 predictive modelling. Deconfounding predictive models without justification for *sex* and *age* in many cases  
379 may not be entirely wrong. However, if not based on a proper causal analysis, such unjustified adjustment may  
380 be imprecise and prevents both, replicability and a finer understanding of biological cause-effect relationships.

381 For many neurobiomedical mechanisms, clear cause-effect relationships are still unknown. Potentially  
382 identical processes are approached and described by different disciplines from varying perspectives. This  
383 creates multi-dimensional explanations of potentially low-dimensional neurobiomedical mechanisms. The  
384 underlying and unambiguous cause-effect chains and networks however remain poorly understood. To  
385 determine the functioning, structure, interplay and dimensionality of neurobiomedicine, the field requires the

<sup>3</sup> Usage of a linear algorithm for the prediction (see methods in supplementary materials).

<sup>4</sup> The important investigation on the (un-)ambiguity of the concepts of biological sex and age is beyond the scope of this manuscript and can therefore be found in-depth elsewhere.

386 integration of information across disciplines, scales and species. The gained insights from provisional causal  
387 models can improve and inform the next formalized causal analyses and causal predictive models, which in  
388 turn can provide new provisional causal insights. Such a recursive feedback loop within causal predictive  
389 modelling but also across scales and species (e.g. from direct interventional animal research) can iteratively  
390 clarify and improve what is known about neurobiomedical cause-effect relationships. Additionally, mutual  
391 recursive feedback of causal knowledge from experimental setups can inform the DAGs for observational  
392 analyses. The observational causal predictive models in turn can both inform experimental setups about the  
393 generalizability of effects and create new provisional causal insights. A recursive feedback mechanism thereby  
394 is important to avoid accumulation of errors. Thereby the field as a whole, beyond individual research projects,  
395 can contribute to shaping a neurobiomedical causal diagram based on the understanding of underlying  
396 mechanisms. Ultimately, this could help disentangle the causal structure of neurobiomedicine and determine  
397 orthogonal (independent) biological dimensions.

398 While the investigation and use of cause-effect relationships is more commonly used in fields such as  
399 economics or social sciences, it is so far seldomly applied for correctly deconfounding neurobiomedical  
400 predictive models. With the proposed 5-step approach, we hope to provide an easy-to-use standard approach  
401 for causal predictive modelling. Through causally motivated deconfounding, we aim to foster the relevance of  
402 low performing or even null results models if they originate from a “skilful interrogation of nature”. Ultimately,  
403 mutual recursive feedback loops of causal insights across disciplines, scales and species can enable the field  
404 to disentangle the cause-effect structure of neurobiomedical mechanisms. Through understanding and  
405 knowledge, this can facilitate reliable and trustworthy AI as a medical tool.

406 **5. References**

- 407 1. Berisha V, Krantsevich C, Hahn PR, et al. Digital medicine and the curse of dimensionality. *Npj Digit*  
408 *Med.* 2021;4(1):153. doi:10.1038/s41746-021-00521-5
- 409 2. Darcy AM, Louie AK, Roberts LW. Machine Learning and the Profession of Medicine. *JAMA.*  
410 2016;315(6):551. doi:10.1001/jama.2015.18421
- 411 3. Jiang F, Jiang Y, Zhi H, et al. Artificial intelligence in healthcare: past, present and future. *Stroke Vasc*  
412 *Neurol.* 2017;2(4):230-243. doi:10.1136/svn-2017-000101
- 413 4. Arbabshirani MR, Plis S, Sui J, Calhoun VD. Single subject prediction of brain disorders in neuroimaging:  
414 Promises and pitfalls. *NeuroImage.* 2017;145:137-165. doi:10.1016/j.neuroimage.2016.02.079
- 415 5. Benkarim O, Paquola C, Park B yong, et al. The Cost of Untracked Diversity in Brain-Imaging Prediction.  
416 *bioRxiv.* Published online June 2021:34. doi:<https://doi.org/10.1101/2021.06.16.448764>
- 417 6. Pulini AA, Kerr WT, Loo SK, Lenartowicz A. Classification Accuracy of Neuroimaging Biomarkers in  
418 Attention-Deficit/Hyperactivity Disorder: Effects of Sample Size and Circular Analysis. *Biol Psychiatry*  
419 *Cogn Neurosci Neuroimaging.* 2019;4(2):108-120. doi:10.1016/j.bpsc.2018.06.003
- 420 7. Woo CW, Chang LJ, Lindquist MA, Wager TD. Building better biomarkers: brain models in translational  
421 neuroimaging. *Nat Neurosci.* 2017;20(3):365-377. doi:10.1038/nn.4478
- 422 8. Heinrichs B, Eickhoff SB. Your evidence? Machine learning algorithms for medical diagnosis and  
423 prediction. *Hum Brain Mapp.* 2020;41(6):1435-1444. doi:10.1002/hbm.24886
- 424 9. Kapoor S, Narayanan A. Leakage and the Reproducibility Crisis in ML-based Science. Published online  
425 July 14, 2022. Accessed January 31, 2023. <http://arxiv.org/abs/2207.07048>
- 426 10. Alfaro-Almagro F, McCarthy P, Afyouni S, et al. Confound modelling in UK Biobank brain imaging☆.  
427 Published online 2021:17.
- 428 11. Dinga R, Schmaal L, Penninx BWJH, Veltman DJ, Marquand AF. *Controlling for Effects of Confounding*  
429 *Variables on Machine Learning Predictions.* *Bioinformatics;* 2020. doi:10.1101/2020.08.17.255034
- 430 12. Weinberger DR, Radulescu E. Finding the Elusive Psychiatric “Lesion” With 21st-Century  
431 Neuroanatomy: A Note of Caution. *Am J Psychiatry.* 2016;173(1):27-33.  
432 doi:10.1176/appi.ajp.2015.15060753
- 433 13. Rao A, Monteiro JM, Mourao-Miranda J. Predictive modelling using neuroimaging data in the presence  
434 of confounds. *NeuroImage.* 2017;150:23-49. doi:10.1016/j.neuroimage.2017.01.066
- 435 14. Geerligs L, Tsvetanov KA, Cam-CAN, Henson RN. Challenges in measuring individual differences in  
436 functional connectivity using fMRI: The case of healthy aging: Measuring Individual Differences Using  
437 fMRI. *Hum Brain Mapp.* 2017;38(8):4125-4156. doi:10.1002/hbm.23653
- 438 15. Power JD, Barnes KA, Snyder AZ, Schlaggar BL, Petersen SE. Spurious but systematic correlations in  
439 functional connectivity MRI networks arise from subject motion. *NeuroImage.* 2012;59(3):2142-2154.  
440 doi:10.1016/j.neuroimage.2011.10.018
- 441 16. Satterthwaite TD, Wolf DH, Loughead J, et al. Impact of in-scanner head motion on multiple measures of  
442 functional connectivity: Relevance for studies of neurodevelopment in youth. *NeuroImage.*  
443 2012;60(1):623-632. doi:10.1016/j.neuroimage.2011.12.063



- 444 17. Spisak T. Statistical quantification of confounding bias in predictive modelling. Published online  
445 November 1, 2021. Accessed January 31, 2023. <http://arxiv.org/abs/2111.00814>
- 446 18. Bugg JM, Zook NA, DeLosh EL, Davalos DB, Davis HP. Age differences in fluid intelligence:  
447 Contributions of general slowing and frontal decline. *Brain Cogn.* 2006;62(1):9-16.  
448 doi:10.1016/j.bandc.2006.02.006
- 449 19. Hartshorne JK, Germine LT. When Does Cognitive Functioning Peak? The Asynchronous Rise and Fall  
450 of Different Cognitive Abilities Across the Life Span. *Psychol Sci.* 2015;26(4):433-443.  
451 doi:10.1177/0956797614567339
- 452 20. Horn (1967) - age differences in fluid and crystallized intelligence.pdf.
- 453 21. Kahlert J, Gribsholt SB, Gammelager H, Dekkers OM, Luta G. Control of confounding in the analysis  
454 phase &ndash; an overview for clinicians. *Clin Epidemiol.* 2017;Volume 9:195-204.  
455 doi:10.2147/CLEP.S129886
- 456 22. Rao A, Monteiro JM, Ashburner J, et al. A comparison of strategies for incorporating nuisance variables  
457 into predictive neuroimaging models. In: *2015 International Workshop on Pattern Recognition in*  
458 *Neuroimaging.* ; 2015:61-64.
- 459 23. Kostro D, Abdulkadir A, Durr A, et al. Correction of inter-scanner and within-subject variance in structural  
460 MRI based automated diagnosing. *NeuroImage.* 2014;98:405-415.  
461 doi:10.1016/j.neuroimage.2014.04.057
- 462 24. Abdulkadir A, Ronneberger O, Tabrizi SJ, Klöppel S. Reduction of confounding effects with voxel-wise  
463 Gaussian process regression in structural MRI. In: *2014 International Workshop on Pattern Recognition*  
464 *in Neuroimaging.* IEEE; 2014:1-4.
- 465 25. Dukart J, Schroeter ML, Mueller K, The Alzheimer's Disease Neuroimaging Initiative. Age Correction in  
466 Dementia – Matching to a Healthy Brain. Valdes-Sosa PA, ed. *PLoS ONE.* 2011;6(7):e22193.  
467 doi:10.1371/journal.pone.0022193
- 468 26. Snoek L, Miletić S, Scholte HS. How to control for confounds in decoding analyses of neuroimaging data.  
469 *NeuroImage.* 2019;184:741-760. doi:10.1016/j.neuroimage.2018.09.074
- 470 27. Miller KL, Alfaro-Almagro F, Bangerter NK, et al. Multimodal population brain imaging in the UK  
471 Biobank prospective epidemiological study. *Nat Neurosci.* 2016;19(11):1523-1536. doi:10.1038/nn.4393
- 472 28. Weinstein SM, Davatzikos C, Doshi J, Linn KA, Shinohara RT, For the Alzheimer's Disease  
473 Neuroimaging Initiative. Penalized decomposition using residuals (PeDecURe) for feature extraction in  
474 the presence of nuisance variables. *Biostatistics.* Published online August 11, 2022:kxac031.  
475 doi:10.1093/biostatistics/kxac031
- 476 29. Wysocki AC, Lawson KM, Rhemtulla M. Statistical Control Requires Causal Justification. *Advances in*  
477 *Methods and Practices in Psychological Science.* 2022;5(2).
- 478 30. Becker TE. Potential Problems in the Statistical Control of Variables in Organizational Research: A  
479 Qualitative Analysis With Recommendations. *Organ Res Methods.* 2005;8(3):274-289.  
480 doi:10.1177/1094428105278021
- 481 31. Bernerth JB, Aguinis H. A Critical Review and Best-Practice Recommendations for Control Variable  
482 Usage. *Pers Psychol.* 2016;69(1):229-283. doi:10.1111/peps.12103

- 483 32. Atinc G, Simmering MJ, Kroll MJ. Control Variable Use and Reporting in Macro and Micro Management  
484 Research. *Organ Res Methods*. 2012;15(1):57-74. doi:10.1177/1094428110397773
- 485 33. Carlson KD, Wu J. The Illusion of Statistical Control: Control Variable Practice in Management Research.  
486 *Organ Res Methods*. 2012;15(3):413-435. doi:10.1177/1094428111428817
- 487 34. Pourhoseingholi MA, Baghestani AR, Vahedi M. How to control confounding effects by statistical  
488 analysis. *Gastroenterol Hepatol Bed Bench*. 2012;5(2):79-83.
- 489 35. Chyzyk D, Varoquaux G, Milham M, Thirion B. How to remove or control confounds in predictive  
490 models, with applications to brain biomarkers. *GigaScience*. 2022;11:giac014.  
491 doi:10.1093/gigascience/giac014
- 492 36. Pearl J, Mackenzie D. *The Book of Why: The New Science of Cause and Effect*. Basic Books; 2018.
- 493 37. Quinonero-Candela J, Sugiyama M, Schwaighofer A, Lawrence ND. *Dataset Shift in Machine Learning*.  
494 Mit Press; 2008.
- 495 38. Huyen C. *Designing Machine Learning Systems: An Iterative Process for Production-Ready Applications*.  
496 First edition. O'Reilly Media, Inc; 2022.
- 497 39. Pearl J. Causal inference in statistics: An overview. *Stat Surv*. 2009;3(none). doi:10.1214/09-SS057
- 498 40. Sudlow C, Gallacher J, Allen N, et al. UK Biobank: An Open Access Resource for Identifying the Causes  
499 of a Wide Range of Complex Diseases of Middle and Old Age. *PLOS Med*. 2015;12(3):e1001779.  
500 doi:10.1371/journal.pmed.1001779
- 501 41. Elwert F, Winship C. Endogenous Selection Bias: The Problem of Conditioning on a Collider Variable.  
502 *Annu Rev Sociol*. 2014;40(1):31-53. doi:10.1146/annurev-soc-071913-043455
- 503 42. Rohrer JM. Thinking Clearly About Correlations and Causation: Graphical Causal Models for  
504 Observational Data.
- 505 43. Berkson J. Limitations of the Application of Fourfold Table Analysis to Hospital Data. *Biom Bull*.  
506 1946;2(3):47. doi:10.2307/3002000
- 507 44. Baron RM, Kenny DA. The moderator–mediator variable distinction in social psychological research:  
508 Conceptual, strategic, and statistical considerations. *J Pers Soc Psychol*. 1986;51(6):1173.
- 509 45. Hayes AF. Beyond Baron and Kenny: Statistical mediation analysis in the new millennium. *Commun*  
510 *Monogr*. 2009;76(4):408-420.
- 511 46. Judd CM, Kenny DA. Process analysis: Estimating mediation in treatment evaluations. *Eval Rev*.  
512 1981;5(5):602-619.
- 513 47. Maxwell SE, Cole DA. Bias in cross-sectional analyses of longitudinal mediation. *Psychol Methods*.  
514 2007;12(1):23-44. doi:10.1037/1082-989X.12.1.23
- 515 48. Pearl J. Causal diagrams for empirical research.
- 516 49. Sprenger J, Weinberger N. Simpson's paradox. In: Zalta EN, ed. *The Stanford Encyclopedia of*  
517 *Philosophy*. Summer 2021. Metaphysics Research Lab, Stanford University; 2021.  
518 <https://plato.stanford.edu/archives/sum2021/entries/paradox-simpson/>

- 519 50. Textor J, Hardt J, Knüppel S. DAGitty: A Graphical Tool for Analyzing Causal Diagrams. *Epidemiology*.  
520 2011;22(5):745. doi:10.1097/EDE.0b013e318225c2be
- 521 51. Swain CTV, Drummond AE, Boing L, et al. Linking Physical Activity to Breast Cancer via Sex Hormones,  
522 Part 1: The Effect of Physical Activity on Sex Steroid Hormones. *Cancer Epidemiol Biomarkers Prev*.  
523 2022;31(1):16-27. doi:10.1158/1055-9965.EPI-21-0437
- 524 52. Ambroży T, Rydzik Ł, Obmiński Z, et al. The Effect of High-Intensity Interval Training Periods on  
525 Morning Serum Testosterone and Cortisol Levels and Physical Fitness in Men Aged 35–40 Years. *J Clin*  
526 *Med*. 2021;10(10):2143. doi:10.3390/jcm10102143
- 527 53. Tchernof A, Després JP, Bélanger A, et al. Reduced testosterone and adrenal C19 steroid levels in obese  
528 men. *Metabolism*. 1995;44(4):513-519. doi:10.1016/0026-0495(95)90060-8
- 529 54. Hamdan S, Love BC, von Polier GG, et al. Confound-leakage: confound removal in machine learning  
530 leads to leakage. *GigaScience*. 2023;12.
- 531

532 **Acknowledgments**

533 This research has been conducted using the UK Biobank Resource under application number 41655. This  
534 research was funded by the Deutsche Forschungsgemeinschaft (DFG, German Research Foundation) –  
535 Project-ID 431549029 - Collaborative Research Centre CRC1451 on motor performance project B05.

536 We additionally want to acknowledge Prof Dr Bert Heinrich and Dr Jan-Hendrik Heinrichs from the group for  
537 Neuroethics and Ethics in AI at the INM-7, Research Centre Juelich, Germany, for their truly valuable and  
538 inspiring contribution to the manuscript from a philosophical perspective on AI.

539 **Author contributions**

540 All authors contributed to discussing, reviewing, and editing the content of the manuscript, and agreed to the  
541 final version of the manuscript.

542 **Competing interests**

543 The authors declare no competing interests.

544
